# Supplementary material for: B Cells and Ectopic Follicular Structures: Novel Players in Anti-Tumor Programming with Prognostic Power for Patients with Metastatic Colorectal Cancer
Source: PubMed Central journal article supplement (PMC4048213; doi:10.1371/journal.pone.0099008), 2014-06-06
Supplement: pone.0099008.s009.pdf [file pone.0099008.s009.pdf]

|                                 | Oxaliplatin<br>median (min– max)                         | Irinotecan<br>median (min–max)                        |
|---------------------------------|----------------------------------------------------------|-------------------------------------------------------|
| CD45_Border_Panel II            | 4.2 (3.0 – 5.1)                                          | 3.8*                                                  |
| CD45_Liver Portal Vein_Panel II | 4.7 (3.2 – 5.7)                                          | 5.1*                                                  |
| CD45_Liver Distant_Panel II     | 3.2 (2.5 – 4.0)                                          | 3.6*                                                  |
| CD20_Border_Panel II            | 1.1 (-1.6 – 3.7)                                         | 1.6 (-1.6 – 2.1)                                      |
| CD20_Liver Portal Vein_Panel II | 2.0 (-3.6 – 4.1)                                         | 2.7 (-0.3 – 3.5)                                      |
| CD20_Liver Distant_Panel II     | -3.5 (-13.3 – -1.0)                                      | -2.3 (-4.3 – -1.3)                                    |
| CD68_Border_Panel II            | 2.3 (1.0 – 4.0)                                          | 2.1 (1.6 – 3.9)                                       |
| CD68_Liver Portal Vein_Panel II | 1.7 (0.1 – 3.1)                                          | 1.4 (-0.7 – 1.7)                                      |
| CD68_Liver Distant_Panel II     | 1.3 (0.1 – 2.2)                                          | 0.7 (0.3 – 2.4)                                       |
| Ectopic Follicles               | no – 16 (34.8%)<br>low – 15 (32.6%)<br>high – 15 (32.6%) | no – 2 (40.0%)<br>low – 2 (40.0%)<br>high – 1 (20.0%) |

Log2 transformed values for continuous variables are shown. Continuous data were described with median, minimum and maximum; categorical data were described by absolute and relative frequencies. \*CD45 data sets include one measurement for irinotecan and 18 values for oxaliplatin; thus, the single measurement value for irinotecan is shown. Due to the small number of observations in the irinotecan group, statistical tests have a small power to detect differences and a pure description of the data is more appropriate.

Table S3
